# Supplementary material
Source: MDPI journal article supplement (https://www.mdpi.com/2304-6740/10/8/105)
Supplement: s1 [file s1]

## Supplementary file

# Field induced single molecule magnetic behavior of a mononuclear cobalt (II) Schiff base complex derived from 5-bromo vanillin

Fikre Elemo<sup>1,2</sup>, Sören Schlittenhardt<sup>3</sup>, Taju Sani<sup>1,2</sup>, Cyril Rajnák<sup>5</sup>, Wolfgang Linert<sup>6</sup>, Roman Boča<sup>5</sup>, Madhu Thomas<sup>\*1,2</sup> and Mario Ruben<sup>\*3,4,7</sup>

<sup>1</sup>Department of Industrial Chemistry, College of Applied Science, Addis Ababa Science and Technology University, P.o.Box, 16417, Addis Ababa, Ethiopia

<sup>2</sup>Nanotechnology Centre of Excellence, Addis Ababa Science and Technology University, Addis Ababa, Ethiopia, P.o.Box, 16417

<sup>3</sup>Karlsruhe Institute of Technology, Institute of Nanotechnology, Hermann-von-Helmholtz-Platz 1, D-76344 Eggenstein-Leopoldshafen, Germany

<sup>4</sup>Karlsruhe Institute of Technology, Institute for Quantum Materials and Technologies, Hermann-von-Helmholtz-Platz 1, D-76344 Eggenstein-Leopoldshafen, Germany

<sup>5</sup>Department of Chemistry, Faculty of Natural Sciences, University of SS Cyril and Methodius, 91701 Trnava, Slovakia

<sup>6</sup>Institute of Applied Physics, Vienna University of Technology, Wiedner Hauptstraße 8-10, 1040 Vienna, Austria,

<sup>7</sup>Centre Européen de Science Qantique (CESQ); Institut de Science et d'Ingénierie Supramoléculaires (ISIS, UMR 7006), CNRS-Université de Strasbourg, 8 allée Gaspard Monge BP 70028 67083 Strasbourg Cedex, France

\* Correspondence: Madhu Thomas, e-mail; madhu.thomas@aastu.edu.et and Mario Ruben, email; mario.ruben@kit.edu

Table S1. Crystal data and structure refinement for  $\text{Co}(\text{C}_{19}\text{H}_{17}\text{BrN}_3\text{O}_3)_2$ 

|                                                |                                                                                             |
|------------------------------------------------|---------------------------------------------------------------------------------------------|
| The compound                                   | $\text{Co}(\text{C}_{19}\text{H}_{17}\text{BrN}_3\text{O}_3)_2 \cdot 4\text{CH}_3\text{OH}$ |
| Empirical formula                              | $\text{C}_{42}\text{H}_{50}\text{Br}_2\text{CoN}_6\text{O}_{10}$                            |
| Formula weight                                 | 1017.63                                                                                     |
| Temperature/K                                  | 160.00                                                                                      |
| Crystal system                                 | monoclinic                                                                                  |
| Space group                                    | Cc                                                                                          |
| a/Å                                            | 19.3278(4)                                                                                  |
| b/Å                                            | 20.4812(4)                                                                                  |
| c/Å                                            | 22.8624(6)                                                                                  |
| $\alpha/^\circ$                                | 90                                                                                          |
| $\beta/^\circ$                                 | 102.070(2)                                                                                  |
| $\gamma/^\circ$                                | 90                                                                                          |
| Volume/Å <sup>3</sup>                          | 8850.2(43)                                                                                  |
| Z                                              | 8                                                                                           |
| $\rho_{\text{calc}}/\text{g cm}^{-3}$          | 1.528                                                                                       |
| $\mu/\text{mm}^{-1}$                           | 3.903                                                                                       |
| F(000)                                         | 4168                                                                                        |
| Crystal size/mm <sup>3</sup>                   | 0.1 × 0.08 × 0.08                                                                           |
| Radiation                                      | GaK $\alpha$ ( $\lambda = 1.34143$ )                                                        |
| 2 $\theta$ range for data collection/ $^\circ$ | 5.54 to 125.1                                                                               |
| Index ranges                                   | $-21 \leq h \leq 25$ , $-26 \leq k \leq 27$ , $-30 \leq l \leq 19$                          |
| Reflections collected                          | 47072                                                                                       |
| Independent reflections                        | 14114 [ $R_{\text{int}} = 0.0261$ , $R_{\text{sigma}} = 0.0212$ ]                           |
| Data/restraints/parameters                     | 14114/2/1127                                                                                |
| Goodness-of-fit on $F^2$                       | 1.038                                                                                       |
| Final R indexes [ $ I  \geq 2\sigma(I)$ ]      | $R_1 = 0.0315$ , $wR_2 = 0.0790$                                                            |
| Final R indexes [all data]                     | $R_1 = 0.0348$ , $wR_2 = 0.0804$                                                            |
| Largest diff. peak/hole / e Å <sup>-3</sup>    | 0.56/-0.43                                                                                  |
| Flack parameter                                | 0.099(3)                                                                                    |
| CCDC number                                    | 2170911                                                                                     |

Table S2. Selected bond Lengths for  $\text{Co}(\text{C}_{19}\text{H}_{17}\text{BrN}_3\text{O}_3)_2$       Table S3. Selected bond Angles for  $\text{Co}(\text{C}_{19}\text{H}_{17}\text{BrN}_3\text{O}_3)_2$

| Atom | Atom | Length/Å |
|------|------|----------|
| Co1  | O6   | 2.210(2) |
| Co1  | O2   | 2.041(2) |
| Co1  | O5   | 2.066(3) |
| Co1  | O3   | 2.189(2) |
| Co1  | N1   | 2.087(2) |
| Co1  | N4   | 2.086(2) |
| Co2  | O12  | 2.191(2) |
| Co2  | O11  | 1.995(2) |
| Co2  | O9   | 2.242(2) |
| Co2  | O8   | 2.015(2) |
| Co2  | N7   | 2.079(2) |
| Co2  | N10  | 2.092(2) |

| Atom | Atom | Atom | Angle/°    |
|------|------|------|------------|
| O2   | Co1  | O6   | 88.71(9)   |
| O5   | Co1  | O6   | 167.37(8)  |
| O5   | Co1  | O2   | 99.07(9)   |
| O3   | Co1  | O6   | 83.99(9)   |
| O3   | Co1  | O2   | 166.17(9)  |
| O3   | Co1  | O5   | 90.27(9)   |
| N1   | Co1  | O6   | 99.40(10)  |
| N1   | Co1  | O2   | 87.89(9)   |
| N1   | Co1  | O5   | 90.87(10)  |
| N1   | Co1  | O3   | 81.76(9)   |
| N4   | Co1  | O6   | 81.41(10)  |
| N4   | Co1  | O2   | 97.32(9)   |
| N4   | Co1  | O5   | 87.70(11)  |
| N4   | Co1  | O3   | 93.19(9)   |
| N4   | Co1  | N1   | 174.75(10) |
| O11  | Co2  | O12  | 167.24(8)  |
| O9   | Co2  | O12  | 82.46(8)   |
| O9   | Co2  | O11  | 89.05(9)   |
| O8   | Co2  | O12  | 89.63(9)   |
| O8   | Co2  | O11  | 100.30(10) |
| O8   | Co2  | O9   | 167.21(9)  |
| N7   | Co2  | O12  | 93.89(10)  |
| N7   | Co2  | O11  | 94.17(10)  |
| N7   | Co2  | O9   | 80.99(9)   |
| N7   | Co2  | O8   | 89.57(9)   |
| N10  | Co2  | O12  | 82.05(10)  |
| N10  | Co2  | O11  | 88.89(10)  |
| N10  | Co2  | O9   | 92.71(9)   |
| N10  | Co2  | O8   | 96.15(9)   |
| N10  | Co2  | N7   | 172.94(11) |
| C66  | O12  | Co2  | 104.9(2)   |
| C28  | O6   | Co1  | 105.0(2)   |
| C59  | O11  | Co2  | 127.6(2)   |
| C47  | O9   | Co2  | 104.88(19) |
| C2   | O2   | Co1  | 125.70(18) |

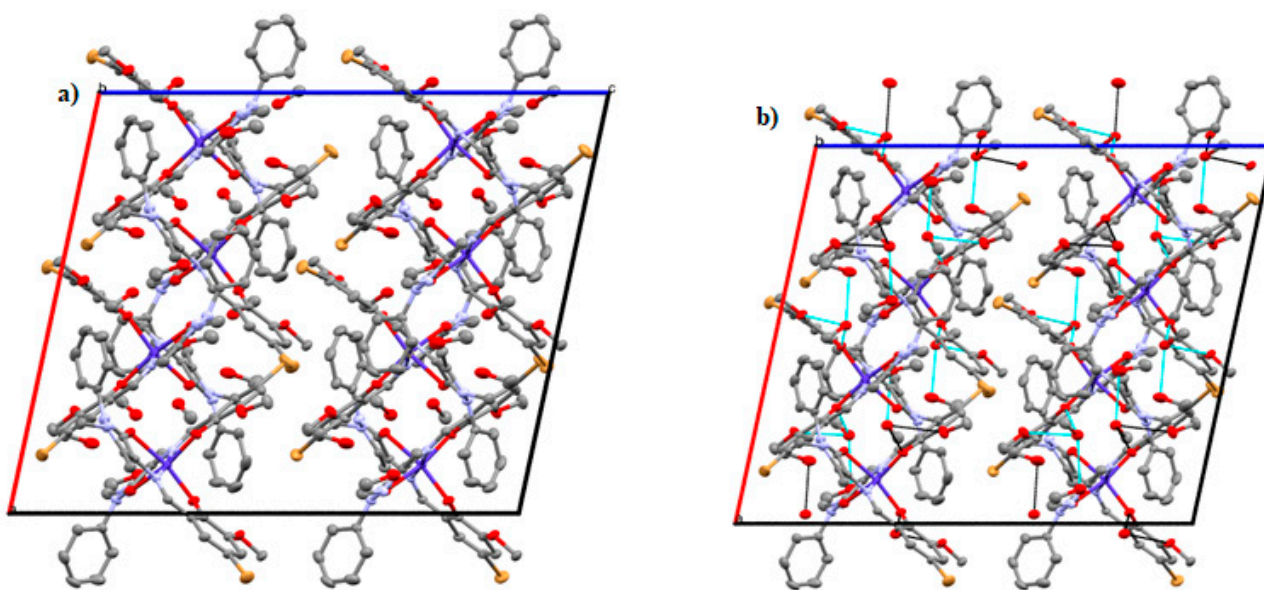

Figure S1. Crystal packing along b axis a) without H-bonding b) with H-bonding

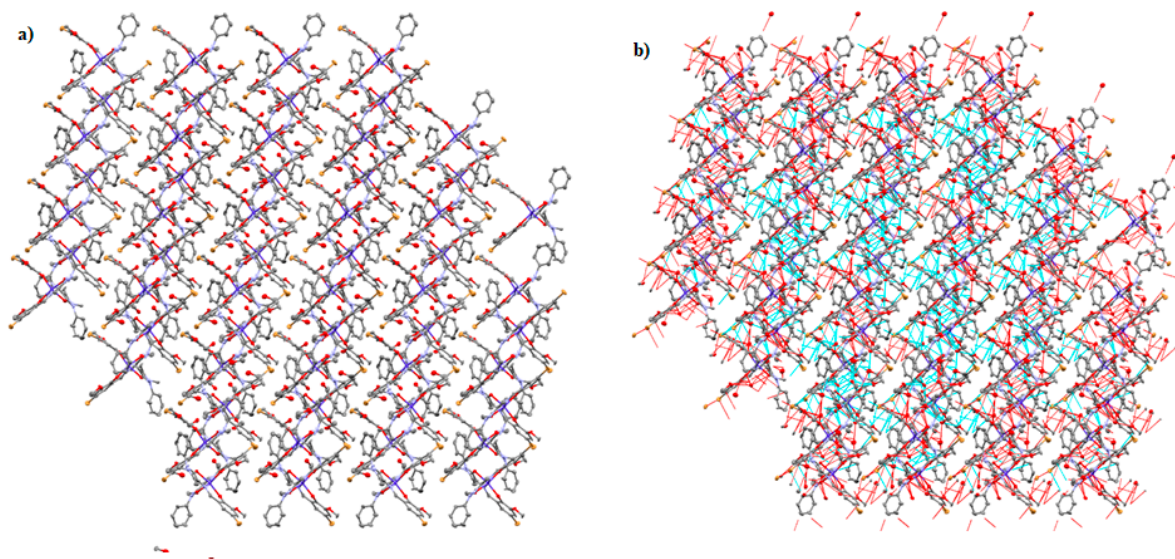

Figure S2. Crystal packing along b axis a) without H-bonding b) with H-bonding

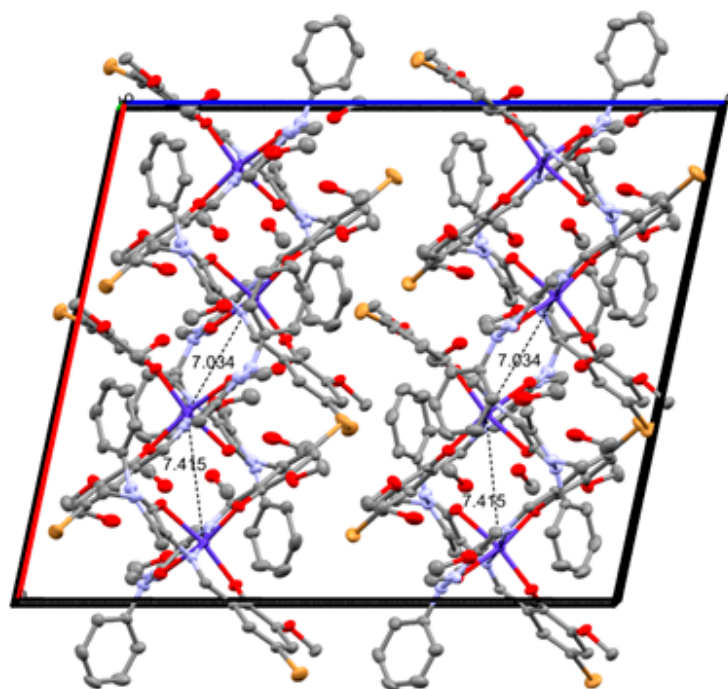

Figure S3. Intralayer M...M distances in the molecule
